# Supplementary material
Source: PubMed Central journal article supplement (PMC6040197)
Supplement: JB.00025-18_zjb999094802s1.pdf [file JB.00025-18_zjb999094802s1.pdf]

Fig. S1. Cheng et al.

CLUSTAL o(1.2.4) multiple sequence alignment

```
PgtA      MHWPLIWKVKVQWLFWSYSKMKSTVLLIDDDQVLDLSYHLMSIAGLTAKAVIDPTQAMSH 60
VC1522   -----MSPVLDLNQTHLYQAFSVLLVDDEVGMQLVVKKALSKWFSRVDLASSIEEAEVL 54
FlrC     -----MKMAQSKVLI VEDDEGLREALIDTLALAGYEWLEADCAEDALLK 44
LuxO     -----MVEDTASVAALYRSYLTPLDIDINIVGTGRDAIES 35
NtrC     -----MMSRSGYVWVDDSSIRWVMEKTLSSAHIKCETFADAEVSLLA 44
DctD-1   -----MCDVFLIDDESIRIALAQSFELADLNAQFFASVEEALLA 40
DctD-2   -----MESQRIALIEDDDIVRQATGQWLQLAGFDVAMFADGASALAA 42
```

Predicted phosphorylation site

```
PgtA      IQPD-WNGVVLDDI MYMPQLHGMELLKQIKAVDDKIPVIVITGHGDI PMAVEAVKMGACDF 119
VC1522   RG-EHHYDLLIIDI NLPGRSGEIWEFEFTDPDHRADVI FMTGFADLETAI SALKLGASDF 113
FlrC     LKSHS-VDIVVSDI VQ MAGMGLALLRSIKQHWPNLPVLLMAYANI QDAVSAMKDGAI DY 103
LuxO     IGRRE-PDLILLD LRLPDMTGMDVLYAVKEKSPDVPI VFMTAHGSDITAVEAMRHGAQDF 94
NtrC     LERET-PDIVVSDI IRMPGMDGIALLNQVHQRTPELPVI IMTAHSDLLAAVNAYQQGAF EY 103
DctD-1   IKAQGLPLVIVSDI CLPGLSGQNLSSVHLHQDSELVPI LITGHGDI SMAVKAMHDGAYDF 100
DctD-2   IEQQSFA-AVVSDI VRLPDTDGLSLLVALKNVQSLMPVILITGHGDVDMAVKALHQGAFDF 101
```

```
PgtA      LEKPINPPQLLTLIKQHLERLRSFIEQ-----KLLLSRSVKRELVGKSAQMEQIRSHVAQ 174
VC1522   ILKPFNLEQMLQAVQRCMKNRLNERLQYALQR--DFQRHCTTQI IGSSVQTELLKQRI VQ 171
FlrC     MAKPFAPVLLNMVSRVYAPVKSD-----DNGDAVVADTKSLK-LLALADK 147
LuxO     LKPCRADRLRVTVNNAIRKASK-----LKNDVDNKNQNYQGF IGSSQTMQAVYRTIDS 148
NtrC     LKPPFDVDETLTLVERAI AHGQEQRTS---HRPSENYSAPEI IGEAPAMQEVFRAI GR 159
DctD-1   IEKPFAPERLIDTVHRAI EKRRLTLENRQLKRSLSKVSQTLGPRI IGETAAI QTLRDTIAQ 160
DctD-2   IEKPFQPERLANTVAQAVSQYQNALSSQSRAHYLASAKGLEQI IIGQCKSI QLLREQIAK 161
```

```
PgtA      YALLNRHVVI VGESGCGRHTIAYLIHQHLLTNNHGLPWVELVA-----SAKT 220
VC1522   FAPSRASVLI EGESGTGKELVARGIHEASGR--QGPFV PINCGAIAPELLESE LFGHTSG 229
FlrC     VAKTDANVMILGPGSGSKEVMSRYIHNASPR-KEGPFIAINCAAIPDNMLEATLFGYEKG 206
LuxO     AASSKASIFITGESGTGKEVCAEAIHAASKR-GDKPFI AINCAAIPKDLIESELFGHVKG 207
NtrC     LRSRSISVLINGESGTGKELVAHALHRHSPR-AQKPFIAINMAAI PKDLIESELFGHEKG 218
DctD-1   VADTQADILLFGETGTGKELVARSLHEQSSR-REQNFVA INCGAVPENLIESELYGHEKG 219
DctD-2   VAAMDTNVI IYGETGCGKELVAQCLHQASER-ORGFVA INCGAIPENLFESE LFGHEAG 220
```

GAFTGA domain

```
PgtA      EW---STVEPKVQESAGGTLIDHIELLSEEVQRNVVQSLLN-----QERLNRPRTR 269
VC1522   AFTGAKKSREGLFRVANGGTLFLDEIGEMPLTMOASLLRVL EQRAVRPVGSEKEVNV DVR 289
FlrC     AFTGANVQACPGKFEQAQGGTILLDEISEMDLNLQAKLLRVLQEREVERLGRSKSIKLDVR 266
LuxO     AFTGATERQGAAEAADGGTLFLDEICEMDLDLQTKLLRFIQ TGTQFKVGSKMKSV DVR 267
NtrC     AFTGANVTRQGRFEQANGGTLFLDEIGDMPDIQTRLLRVLADGQFYRVGGHVAIKVDVR 278
DctD-1   AFTGANRRRVGKFEHAQGGTLFLDEIEMSPMQAQRLLRVLQERVI ERIGSNELI PLDIR 279
DctD-2   AFTGANVKRRIGKLELADKGTFLFLDEIEMSLPAMQVKVLRVLQDHHVVERVGSNQPI TIDLR 280
```

```
PgtA      VIAVIDQPPEQLIAQNQLLPELYYLLNQGGIDVPLL RQRPDIAALFHYFLKQSCYKLGK 329
VC1522   VVAATNRNLQOEVENGRFRGDLYYRLNVLKI EVSPLRERKQDHELPLPFFTKMLCAELGM 349
FlrC     VLATSNRDLQYVQAGHFREDLYYRLNVFPLTWPALCERKDDIEPLANHLIERHCKKGLG 326
LuxO     FVCATNRDPWKEVQGRFRFDLYYRLVVIPLHLPLRARGDDVIEIAYSLGFMSKEEKG 327
NtrC     IVAATHQNLEKLVHQGKFRFDLPHRLNVIRIHIPSLRERRODIEKLTKHFLALAAKELGV 338
DctD-1   VTAATKIDLQAAAEGKFRQDLYYRLNIVTLTIPPLRERREDIPALFHHFLLVAAARYGK 339
DctD-2   VIAAAKEELRQ---HAEFRQDLFYRLNVAQLYLPPLRERGDDI LLLFHFHCVQVKPTWR- 336
```

```
PgtA      PMPNVEPHYALLRAHQWPGNVRELRNVAELYAIGIVKLAG-----KE----- 372
VC1522   PMPKWAYEDISSMQDYDWPGNIRELKNLIERCLLLGKPPA-----HYWRENLGLP 399
FlrC     PVP SIAENAI TKLLNYPWPGNVRELDNVVQRALISENGHIQSEHILLEGVDWHDASSLQ 386
LuxO     DFVRLSAEVVERFRQYEWPGNVRLQNVLRNVVVLNREGREITLDM LPPPL----- 377
NtrC     EMKTLNPRTVDILTCLDWPGNVRLQENMCRWLTVMASGSEV-LPSDLPSE----- 387
DctD-1   AATALTASDVQSLLSHDWPGNVRELRNAAERYVLLGKLAQF-----AE----- 382
DctD-2   ---SLSEADRLALLTYRWPGNVRELRNVALRYALDDSI SVGEILASC FGM----- 383
```

```
PgtA      -----RLYNQEEMLSPLDELVDYEQVIE 397
VC1522   IYAEPEVTMS-----QSNNSEI-----SLGDNVTQPSLGYPNWPLSAVEKAHIQ 444
FlrC     QAVAGE-SMAAPQ--IKPVAEPE---VFKPL-VQGGGQNSSSSQSSGLGGLERDQEFAILL 439
LuxO     ---N---QMSAPINRALPLAHENKVSVH-----EIPFLWMTKEQAI E 413
NtrC     --LL-----KASHFDNDISWQKQLETWAKSALASGETELLAYALPEFERILLE 436
DctD-1   -----SHEPKSKLLGLNEQVAEFESKSLLE 406
DctD-2   -----TEEEASAGLPLAIQVHNFERK VIA 407
```

```
PgtA      DALFLFSGRVADAANYLQVPRKKLYLRMKKHGLEKDAFKARG- 439
VC1522   QIVALHEGNKSAARDLGVARKTLERKYKEWESEDL SHES--- 484
FlrC     DTIAEQGRRKEMA EKLGI SPRTLRYKLAKNR DAGIDI PG--- 479
LuxO     QAIEACDGNIPRAATYLDVSPSTIYRKLQ TWNEKVKKEKER- 455
NtrC     AALHHTNGHKQEA AKVLGWGRNTLTRKLKELY----- 468
DctD-1   QTLIECGGSIKATMERLHLPRKTLYDKMQYQLDKESYKP--- 446
DctD-2   QALHRHQGNI SEVMKELDLPRRTL NQKMQKFGLLRGDFTAQEE 450
```

Fig. S2. Cheng et al.

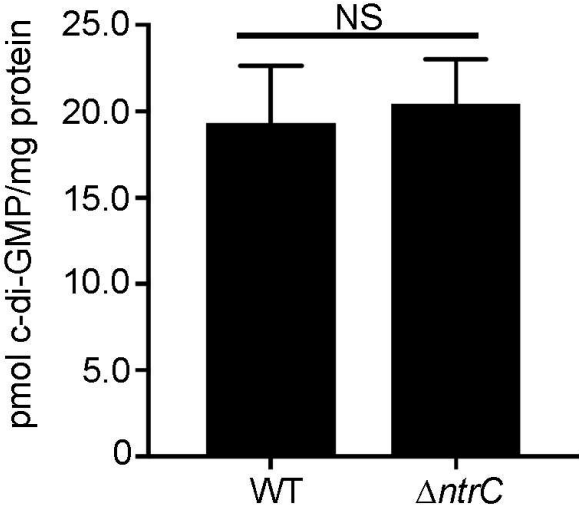



**Figure S1. Multiple sequence alignment of *V. cholerae* NtrC family.** Amino acid sequence alignment of *V. cholerae* NtrC family RR using Clustal Omega. The aspartate residue that is predicted to be the site of phosphorylation, and the GAFTGA region that is required for RpoN interaction are shown inside an empty box. The asterisk denotes identity, semicolon and colon denote conservative and semiconservative variations respectively.

**Figure S2. Absence of NtrC has no significant impact on the c-di-GMP pool.** C-di-GMP quantification was performed using Liquid Chromatography and Mass Spectrometry. Nucleotides were extracted from WT and  $\Delta ntrC$  cultures grown to exponential phase. The graph represents the average and standard deviation of pmols of c-di-GMP/mg of total protein obtained from six independent biological samples. A two-tailed Mann Whitney test was used to compare the expression between WT and  $\Delta ntrC$ . NS, not significant.

**Figure S3. Multiple sequence alignment of NtrC from *V. cholerae*, *E. coli* and *S. typhimurium*.** Amino acid sequence alignment of *V. cholerae* NtrC, *E. coli* NtrC (NtrC\_Ec), and *S. typhimurium* NtrC (NtrC\_Sm). The asterisk denotes identity, semicolon and colon denote conservative and semiconservative variations respectively. The percent identity matrix created with Clustal Omega is shown.
